# Supplementary material
Source: publisher figshare collection journal article supplement (https://tandf.figshare.com/ndownloader/files/13563593)
Supplement: Supplementary file 1 [file 13563593]

**Supplementary Table. General Characteristics of the Patients in the Control Group (n = 28) Undergone Conventional Vitreoretinal Surgery under Various Status**

| No. | Sex | Age,<br>year | Eye | BCVA     | Main<br>Dx | Various Factor                                    | Main Surgical Procedure           | Duration,<br>minute | Endoillu,<br>lux | Difficulty<br>Rating | Ergonomics<br>Rating |
|-----|-----|--------------|-----|----------|------------|---------------------------------------------------|-----------------------------------|---------------------|------------------|----------------------|----------------------|
| 1   | M   | 21           | OD  | 20/1,000 | RD         | Recurrent RD, CD                                  | PPV+SOI                           | 48                  | 1926.0           | 1                    | 3                    |
| 2   | M   | 19           | OS  | HM       | RD         | SOT, recurrent RD, cataract                       | Phaco+SOR+PPV+SOI                 | 65                  | 1912.3           | 2                    | 3                    |
| 3   | F   | 64           | OD  | HM       | RD         | PVR, CD                                           | PPV+MP+SOI                        | 40                  | 1908.0           | 2                    | 3                    |
| 4   | F   | 50           | OS  | CF       | RD         | PVR, CD                                           | PPV+MP+SOI                        | 55                  | 1909.7           | 1                    | 4                    |
| 5   | M   | 53           | OD  | CF       | PDR        | PVR, TRD                                          | PPV+MP+SOI                        | 45                  | 1903.0           | 2                    | 3                    |
| 6   | M   | 48           | OS  | 20/400   | SOT        | Cataract                                          | Phaco+SOR                         | 30                  | 1913.3           | 1                    | 5                    |
| 7   | F   | 60           | OS  | CF       | RD         | PVR, CD                                           | PPV+MP+SOI                        | 40                  | 1917.7           | 1                    | 3                    |
| 8   | F   | 37           | OS  | HM       | RD         | Recurrent RD, PVR, CD                             | PPV+MP+SOI                        | 60                  | 1907.0           | 2                    | 2                    |
| 9   | F   | 25           | OS  | 20/400   | PDR        | PVR, VH, TRD                                      | PPV+SOI                           | 55                  | 1898.7           | 2                    | 3                    |
| 10  | F   | 48           | OD  | HM       | RD         | Recurrent RD, PVR, cataract                       | Phaco+SOR+PPV+MP +SOI             | 70                  | 1894.3           | 1                    | 2                    |
| 11  | F   | 41           | OD  | 20/100   | PDR        | PVR, TRD, VH                                      | PPV+MP+SOI                        | 60                  | 1901.0           | 2                    | 3                    |
| 12  | F   | 51           | OD  | 20/250   | PRD        | VH, PVR                                           | PPV+MP+air tamponade              | 40                  | 1902.0           | 1                    | 4                    |
| 13  | M   | 58           | OD  | CF       | RD         | Recurrent RD, highly myopic,<br>PVR               | PPV+MP+SOI                        | 55                  | 1919.7           | 2                    | 4                    |
| 14  | M   | 52           | OS  | 20/200   | RD         | CD                                                | PPV+SOI                           | 30                  | 1919.0           | 1                    | 5                    |
| 15  | F   | 65           | OS  | HM       | RD         | SOT, recurrent RD, CD, opacity<br>of lens capsule | Lensectomy+SOR+PPV+retinotomy+SOI | 80                  | 1909.3           | 4                    | 2                    |
| 16  | M   | 53           | OS  | 20/500   | SOT        | Cataract                                          | Phaco+SOR                         | 35                  | 1913.7           | 1                    | 4                    |
| 17  | M   | 34           | OS  | CF       | RD         | SOT, recurrent RD, CD                             | SOR+PPV+SOI                       | 50                  | 1913.7           | 2                    | 3                    |

|    |   |    |    |          |     |                             |                        |    |        |   |   |
|----|---|----|----|----------|-----|-----------------------------|------------------------|----|--------|---|---|
| 18 | M | 45 | OD | HM       | RD  | SOT, recurrent RD, CD       | SOR+PPV+MP+SOI         | 44 | 1895.3 | 2 | 2 |
| 19 | F | 44 | OD | 20/2,000 | RD  | Highly myopic, macular hole | PPV+ILMP+SOI           | 40 | 1923.0 | 2 | 2 |
| 20 | M | 34 | OS | 20/500   | RD  | Highly myopic, PVR, CD      | PPV+SOI                | 48 | 1903.0 | 1 | 3 |
| 21 | M | 81 | OD | HM       | RD  | CD, PVR                     | PPV+air tamponade      | 30 | 1916.3 | 1 | 4 |
| 22 | F | 62 | OD | HM       | PDR | PVR, TRD, VH                | PPV+SOI                | 38 | 1915.3 | 2 | 3 |
| 23 | M | 68 | OD | 20/1,000 | RD  | PVR, CD                     | PPV+MP+SOI             | 36 | 1889.3 | 1 | 4 |
| 24 | M | 63 | OS | CF       | RD  | SOT, recurrent RD, PVR      | SOR+PPV+retinotomy+SOI | 65 | 1943.0 | 3 | 1 |
| 25 | F | 54 | OD | 20/1,000 | RD  | SOT, recurrent RD           | SOR+PPV+SOI            | 45 | 1923.3 | 1 | 3 |
| 26 | M | 74 | OS | CF       | PDR | PVR, VH, TRD                | PPV+SOI                | 52 | 1943.7 | 2 | 4 |
| 27 | M | 46 | OS | HM       | RD  | PVR, CD                     | PPV+MP+SOI             | 35 | 1916.7 | 1 | 5 |
| 28 | M | 54 | OD | HM       | RD  | Highly myopic, PVR          | PPV+SOI                | 40 | 1925.3 | 2 | 2 |

BCVA: best corrected visual acuity; CD: choroidal detachment; CF: counting fingers; Dx: diagnosis; Endoillu: endoillumination; F: female; HM: hand movements; ILMP: internal limiting membrane peeling; lux: luminous emittance; M: male; MP: membrane peeling; OD: right eye; OS: left eye; PDR: proliferative diabetic retinopathy; Phaco: phacoemulsification; PPV: pars plana vitrectomy; PVR: proliferative vitreoretinopathy; RD: retinal detachment. SOI: silicone oil infusion; SOR: silicone oil removal; SOT: silicone oil tamponade; TRD: tractional retinal detachment; VH: vitreous hemorrhage.

## Questionnaire to the Surgeon and Assistants

- 1) Question to the Surgeon: Please rate the general difficulty of the whole surgery ranging from cores 1-5 (1 = not difficult, 5 = absolutely difficult).
- 2) Question to the Surgeon: Please rate the general ergonomics during this of surgery from score 1-5 (1 = very uncomfortable; 5 = very comfortable).
- 3) Question to the Surgeon: What satisfied you during this time of surgery when using the 3D heads-up display surgical platform? (open question)
- 4) Question to the Surgeon: Are there any Advantages and/or Disadvantages you would like to describe when using the 3D heads-up display surgical platform at this time of surgery? (open question)
- 5) Question to the Surgeon and assistants: The main difficulties and discomforts occurred to you during the surgery when you were using the 3D heads-up display surgical platform. (open question)
- 6) Question to the Surgeon and Assistants: What's your preference to 3D surgical platform and convention eyepiece?  
A. 3D surgical platform    B. Conventional eyepiece    C. I am not sure

And what's your main reason? \_\_\_\_\_
